# Supplementary material
Source: Copernicus journal article supplement (doi:10.5194/egusphere-2026-3326)
Supplement: Supplementary file 1 [file egusphere-2026-3326-supplement.pdf]

# Electronic Supplementary Information

To

## Lithium isotopes reveal impaired ion transport in tropical corals exposed to high $p\text{CO}_2$

Nathalie Vigier<sup>a,\*</sup>, Fanny Thibon<sup>a,f</sup>, Riccardo Rodolfo Metalpa<sup>b</sup>, Maryline Montanes<sup>a</sup>, Arbia Jouini<sup>a</sup>, Laurent Counillon<sup>c</sup>, Mallorie Poet<sup>c</sup>, Malcolm McCulloch<sup>d</sup>, Clément Tanvet<sup>b,e</sup>, Philippe Télouk<sup>f</sup>, Steeve Comeau<sup>a,d</sup>

<sup>a</sup>Laboratoire d'Océanographie de Villefranche (LOV), CNRS, Sorbonne Université, 06230 Villefranche-sur-Mer, France

<sup>b</sup>Centre IRD Nouméa, UMR ENTROPIE (IRD, Université de la Réunion, Université de la Nouvelle-Calédonie, Ifremer), Nouméa 98848, New Caledonia

<sup>c</sup>Université Côte d'Azur, CNRS, Laboratoire de Physiologie Cellulaire et Moléculaire (LP2M), 06107 Nice, France

<sup>d</sup>Oceans Graduate School, The University of Western Australia, Crawley 6009, Western Australia, Australia

<sup>e</sup>Univ Brest, CNRS, IRD, Ifremer, LEMAR, F-29280 Plouzané, France

<sup>f</sup>Laboratoire de Géologie de Lyon – Terre Planètes Environnement (LGL-TPE), CNRS, ENS-UCBL-UJM, 69007 Lyon, France

21

22 **Table S1:** pH<sub>cf</sub>, DIC<sub>cf</sub>, Mg/Ca<sub>carb</sub>, Li/Mg<sub>carb</sub>, B/Mg<sub>carb</sub>, B/Ca<sub>carb</sub>, Li/Ca<sub>carb</sub>, Li<sub>carb</sub>, δ<sup>7</sup>Li<sub>carb</sub> and D<sub>Li</sub> of corals species. For each species, we calculated the average  
 23 elemental ratios and B or Li isotope compositions based on 1 to 5 individual measurements (n). SE for standard error (2σ<sub>n</sub>).

| Specie                      | Culture / natural | location | Type | T <sub>sw</sub> (°C) | pH <sub>sw</sub> | δ <sup>11</sup> B (‰) | pH <sub>cf</sub> | DIC <sub>cf</sub> (μmol/kg) | Mg/Ca <sub>carb</sub> (mM) | Li/Mg <sub>carb</sub> (mM) | B/Mg <sub>carb</sub> (mM) | B/Ca <sub>carb</sub> (μM) | Li/Ca <sub>carb</sub> (μM) | Li/Ca <sub>carb</sub> (μg/g) | Li (μg/g) | 2SE  | n | δ <sup>7</sup> Li <sub>carb</sub> (‰) | 2SE | n  | log(D <sub>li</sub> ) | ref. |     |
|-----------------------------|-------------------|----------|------|----------------------|------------------|-----------------------|------------------|-----------------------------|----------------------------|----------------------------|---------------------------|---------------------------|----------------------------|------------------------------|-----------|------|---|---------------------------------------|-----|----|-----------------------|------|-----|
| ACROPORA SP1.               | natural           | Eq. Pac. | CTRL | 30.5                 | 8.03             | 25.2                  | 8.53             | 3663                        | 4.85                       | 1.39                       | 116                       | 554                       | 6.75                       | 1.17                         | 0.48      | –    | 1 | 19.9                                  | –   | 1  | -3.32                 | (a)  |     |
| ACROPORA SP2.               | natural           | Eq. Pac. | CTRL | 30.5                 | 8.03             | 25.4                  | 8.54             | 3515                        | 4.81                       | 1.38                       | 122                       | 577                       | 6.62                       | 1.15                         | 0.52      | 0.05 | 5 | 19.7                                  | 0.5 | 5  | -3.33                 |      |     |
| ECHINOPORA LAMELLOSA        | natural           | Eq. Pac. | CTRL | 30.5                 | 8.03             | 23.5                  | 8.42             | 4108                        | 5.22                       | 1.24                       | 98                        | 510                       | 6.47                       | 1.12                         | 0.53      | 0.09 | 3 | 19.0                                  | 0.2 | 3  | -3.34                 |      |     |
| GALAXEA FASCICULARIS        | natural           | Eq. Pac. | CTRL | 30.5                 | 8.03             | 21.9                  | 8.32             | 3770                        | 4.80                       | 1.24                       | 120                       | 566                       | 5.93                       | 1.03                         | 0.45      | 0.07 | 3 | 20.4                                  | 0.9 | 3  | -3.37                 |      |     |
| MONTIPORA SP.               | natural           | Eq. Pac. | CTRL | 30.5                 | 8.03             | 22.5                  | 8.36             | 4375                        | 5.85                       | 1.33                       | 85                        | 485                       | 7.77                       | 1.35                         | 0.67      | –    | 1 | 19.3                                  | –   | 1  | -3.26                 |      |     |
| POCILLOPORA C.F. DAMICORNIS | natural           | Eq. Pac. | CTRL | 30.5                 | 8.03             | 23.9                  | 8.45             | 3729                        | 5.35                       | 1.22                       | 105                       | 558                       | 6.51                       | 1.13                         | 0.47      | 0.07 | 5 | 19.0                                  | 0.2 | 5  | -3.33                 |      |     |
| PORITES SP.                 | natural           | Eq. Pac. | CTRL | 30.5                 | 8.03             | 24.7                  | 8.50             | 4450                        | 5.91                       | 1.02                       | 78                        | 456                       | 6.00                       | 1.04                         | 0.36      | 0.08 | 5 | 19.0                                  | 0.4 | 5  | -3.37                 |      |     |
| PSAMMOCORA SP.              | natural           | Eq. Pac. | CTRL | 30.5                 | 8.03             | 23.3                  | 8.41             | 4347                        | 5.19                       | 1.31                       | 94                        | 482                       | 6.78                       | 1.17                         | 0.53      | 0.15 | 2 | 19.5                                  | 0.1 | 2  | -3.32                 |      |     |
| ACROPORA SP1.               | natural           | Eq. Pac. | seep | 30.5                 | 7.65             | 23.3                  | 8.41             | 3704                        | 5.05                       | 1.35                       | 113                       | 566                       | 6.80                       | 1.18                         | 0.63      | –    | 1 | 19.1                                  | –   | 1  | -3.32                 |      |     |
| ACROPORA SP2.               | natural           | Eq. Pac. | seep | 30.5                 | 7.65             | 23.5                  | 8.42             | 3805                        | 4.13                       | 1.52                       | 137                       | 550                       | 6.27                       | 1.09                         | 0.42      | 0.09 | 2 | 18.6                                  | 0.2 | 2  | -3.35                 |      |     |
| ECHINOPORA LAMELLOSA        | natural           | Eq. Pac. | seep | 30.5                 | 7.65             | 20.7                  | 8.23             | 4859                        | 5.20                       | 1.26                       | 87                        | 445                       | 6.56                       | 1.14                         | 0.40      | 0.02 | 3 | 18.8                                  | 0.4 | 3  | -3.33                 |      |     |
| GALAXEA FASCICULARIS        | natural           | Eq. Pac. | seep | 30.5                 | 7.65             | 24.5                  | 8.48             | 3468                        | 4.24                       | 1.39                       | 142                       | 593                       | 5.90                       | 1.02                         | 0.44      | 0.23 | 2 | 18.3                                  | 0.3 | 2  | -3.38                 |      |     |
| MONTIPORA SP.               | natural           | Eq. Pac. | seep | 30.5                 | 7.65             | 22.2                  | 8.34             | 4224                        | 5.53                       | 1.36                       | 93                        | 504                       | 7.52                       | 1.30                         | 0.57      | –    | 1 | 19.0                                  | –   | 1  | -3.27                 |      |     |
| POCILLOPORA C.F. DAMICORNIS | natural           | Eq. Pac. | seep | 30.5                 | 7.65             | 22.5                  | 8.36             | 4062                        | 5.06                       | 1.27                       | 105                       | 522                       | 6.42                       | 1.11                         | 0.49      | 0.09 | 4 | 18.7                                  | 0.4 | 4  | -3.34                 |      |     |
| PORITES SP.                 | natural           | Eq. Pac. | seep | 30.5                 | 7.65             | 22.7                  | 8.37             | 3944                        | 5.15                       | 1.20                       | 106                       | 537                       | 6.17                       | 1.07                         | 0.47      | 0.07 | 5 | 18.7                                  | 0.4 | 5  | -3.36                 |      |     |
| PSAMMOCORA SP.              | natural           | Eq. Pac. | seep | 30.5                 | 7.65             | 21.9                  | 8.32             | 4525                        | 5.15                       | 1.36                       | 94                        | 472                       | 7.00                       | 1.21                         | 0.39      | 0.07 | 2 | 19.1                                  | 0.8 | 2  | -3.30                 |      |     |
| PORITES SP. (JCP-1)         | natural           | N. Pac.  | –    | 26.1                 | ~ 8.1            | –                     | –                | –                           | –                          | –                          | –                         | –                         | 6.90                       | 1.19                         | –         | –    | – | 18.8                                  | 0.6 | 9  |                       |      | (d) |
| ACROPORA SP.                | natural           | –        | –    | –                    | ~ 8.1            | –                     | –                | –                           | –                          | –                          | –                         | –                         | –                          | –                            | –         | –    | – | 21.0                                  | –   | 1  |                       |      | (b) |
| PORITES SP.                 | natural           | Eq. Pac. | –    | 27.5                 | ~ 8.1            | –                     | –                | –                           | –                          | –                          | –                         | –                         | 6.41                       | 1.11                         | –         | –    | – | 18.8                                  | 0.2 | 8  |                       |      |     |
| LOPHELIA PERTUSA            | natural           | N. Atl.  | –    | 8.5                  | ~ 8.1            | –                     | –                | –                           | –                          | –                          | –                         | –                         | 6.87                       | 1.19                         | –         | –    | – | 18.9                                  | 0.4 | 40 |                       | (c)  |     |
| LOPHELIA PERTUSA            | natural           | N. Atl.  | –    | 8.5                  | ~ 8.1            | –                     | –                | –                           | –                          | –                          | –                         | –                         | 6.61                       | 1.15                         | –         | –    | – | 19.0                                  | 0.6 | 17 |                       |      |     |
| DESMOPHYLLUM CRISTAGALLI    | natural           | N. Atl.  | –    | 8.5                  | ~ 8.1            | –                     | –                | –                           | –                          | –                          | –                         | –                         | 5.02                       | 0.87                         | –         | –    | – | 19.1                                  | 0.6 | 7  |                       |      |     |
| PORITES LUTEA               | natural           | Eq. Pac. | –    | 23                   | ~ 8.1            | –                     | –                | –                           | –                          | –                          | –                         | –                         | 5.37                       | 0.93                         | –         | –    | – | 22.8                                  | 0.4 | 14 |                       |      |     |

|                        |         |         |   |       |           |           |           |           |      |      |   |         |       |      |   |   |   |      |     |    |     |
|------------------------|---------|---------|---|-------|-----------|-----------|-----------|-----------|------|------|---|---------|-------|------|---|---|---|------|-----|----|-----|
| CLADOCORA CAESPITOSA   | culture | -       | - | 13-22 | 8.07      | -         | -         | -         | -    | -    | - | -       | 7.66  | 1.33 | - | - | - | 21.5 | 0.5 | 15 |     |
| CLADOCORA CAESPITOSA   | culture | -       | - | 13-22 | 7.86      | -         | -         | -         | -    | -    | - | -       | 8.15  | 1.41 | - | - | - | 23.1 | 0.7 | 10 |     |
| ACROPORA SP.           | culture | -       | - | 24    | ~8.1      | -         | -         | -         | -    | -    | - | -       | -     | -    | - | - | - | 17.2 | 0.4 | 4  | (d) |
| ECHINOPORA SP.         | culture | -       | - | 24    | ~8.1      | -         | -         | -         | -    | -    | - | -       | -     | -    | - | - | - | 17.2 | 0.3 | 2  |     |
| GALAXEA SP.            | culture | -       | - | 24    | ~8.1      | -         | -         | -         | -    | -    | - | -       | -     | -    | - | - | - | 17.2 | 0.3 | 4  |     |
| PORITES SP.            | culture | -       | - | 24    | ~8.1      | -         | -         | -         | -    | -    | - | -       | -     | -    | - | - | - | 17.0 |     | 1  |     |
| STYLOPHORA SP.         | culture | -       | - | 24    | ~8.1      | -         | -         | -         | -    | -    | - | -       | -     | -    | - | - | - | 17.6 | 0.2 | 14 |     |
| TURBINARIA RENIFORMIS  | culture | -       | - | 24    | ~8.1      | -         | -         | -         | -    | -    | - | -       | -     | -    | - | - | - | 17.0 | 0.1 | 3  |     |
| PLATIGYRA PINI         | culture | -       | - | 24    | ~8.1      | -         | -         | -         | -    | -    | - | -       | -     | -    | - | - | - | 16.9 |     | 1  |     |
| PORITES SP. (JCP-1)    | natural | N. Pac. | - | 26.1  | ~8.1      | -         | -         | -         | -    | -    | - | -       | 6.90  | 1.19 | - | - | - | 18.8 | 0.6 | 9  |     |
| PORITES SP. (JCP-1)    | natural | N. Pac. | - | 26.1  | ~8.1      | -         | -         | -         | -    | -    | - | -       | -     | -    | - | - | - | 20.2 | 0.1 | 5  | (e) |
| PORITES SP. (JCP-1)    | natural | N. Pac. | - | 26.1  | ~8.1      | -         | -         | -         | -    | -    | - | -       | -     | -    | - | - | - | 20.3 | 0.2 | 4  | (f) |
| ACROPORA YOUNGEI       | culture | -       | - | 21    | 8.10      | -         | 8.51      | 3866      | -    | -    | - | 585-670 | -     | -    | - | - | - | -    | -   | -  | (g) |
| ACROPORA YOUNGEI       | culture | -       | - | 21    | 7.80      | -         | 8.46      | 4044      | -    | -    | - | 555-655 | -     | -    | - | - | - | -    | -   | -  |     |
| ACROPORA YOUNGEI       | culture | -       | - | 21    | 7.60      | -         | 8.44      | 4127      | -    | -    | - | 540-650 | -     | -    | - | - | - | -    | -   | -  |     |
| POCILLOPORA DAMICORNIS | culture | -       | - | 21    | 8.10      | -         | 8.48      | 3493      | -    | -    | - | 620-745 | -     | -    | - | - | - | -    | -   | -  |     |
| POCILLOPORA DAMICORNIS | culture | -       | - | 21    | 7.80      | -         | 8.40      | 3697      | -    | -    | - | 600-730 | -     | -    | - | - | - | -    | -   | -  |     |
| POCILLOPORA DAMICORNIS | culture | -       | - | 21    | 7.60      | -         | 8.35      | 3834      | -    | -    | - | 595-720 | -     | -    | - | - | - | -    | -   | -  |     |
| STYLOPHORA PISTILLATA  | culture | -       | - | -     | 7.20      | -         | 7.93      | -         | -    | -    | - | -       | -     | -    | - | - | - | -    | -   | -  | (h) |
| STYLOPHORA PISTILLATA  | culture | -       | - | -     | 7.40      | -         | 8.02      | -         | -    | -    | - | -       | -     | -    | - | - | - | -    | -   | -  |     |
| STYLOPHORA PISTILLATA  | culture | -       | - | -     | 7.80      | -         | 8.14      | -         | -    | -    | - | -       | -     | -    | - | - | - | -    | -   | -  |     |
| STYLOPHORA PISTILLATA  | culture | -       | - | -     | 8.00      | -         | 8.36      | -         | -    | -    | - | -       | -     | -    | - | - | - | -    | -   | -  |     |
| PORITES SP.            | natural | S. Pac. | - | 23-28 | 8.01-8.10 | 21.2-24.3 | 8.26-8.54 | 3879-3649 | -    | -    | - | 326-555 | -     | -    | - | - | - | -    | -   | -  | (i) |
| LOPHELIA PERTUSA       | natural | N. Atl. | - | 5.9   | -         | -         | -         | -         | 3.49 | 4.07 | - | -       | 14.21 | -    | - | - | - | -    | -   | -  | (j) |
| LOPHELIA PERTUSA       | natural | N. Atl. | - | 5.9   | -         | -         | -         | -         | 3.45 | 4.13 | - | -       | 14.25 | -    | - | - | - | -    | -   | -  |     |
| LOPHELIA PERTUSA       | natural | N. Atl. | - | 7.52  | -         | -         | -         | -         | 3.21 | 3.76 | - | -       | 12.06 | -    | - | - | - | -    | -   | -  |     |
| LOPHELIA PERTUSA       | natural | N. Atl. | - | 7.52  | -         | -         | -         | -         | 3.75 | 3.68 | - | -       | 13.8  | -    | - | - | - | -    | -   | -  |     |
| LOPHELIA PERTUSA       | natural | N. Atl. | - | 6.31  | -         | -         | -         | -         | 2.35 | 3.57 | - | -       | 8.41  | -    | - | - | - | -    | -   | -  |     |
| LOPHELIA PERTUSA       | natural | N. Atl. | - | 8.2   | -         | -         | -         | -         | 3.28 | 3.55 | - | -       | 11.66 | -    | - | - | - | -    | -   | -  |     |

|                      |         |          |   |       |   |   |   |   |      |      |   |   |       |   |   |   |   |   |   |   |
|----------------------|---------|----------|---|-------|---|---|---|---|------|------|---|---|-------|---|---|---|---|---|---|---|
| LOPHELIA PERTUSA     | natural | N. Atl.  | - | 7.28  | - | - | - | - | 2.95 | 3.61 | - | - | 10.63 | - | - | - | - | - | - | - |
| LOPHELIA PERTUSA     | natural | N. Atl.  | - | 8.23  | - | - | - | - | 3.15 | 3.49 | - | - | 10.98 | - | - | - | - | - | - | - |
| LOPHELIA PERTUSA     | natural | N. Atl.  | - | 7.92  | - | - | - | - | 2.33 | 3.55 | - | - | 8.28  | - | - | - | - | - | - | - |
| LOPHELIA PERTUSA     | natural | N. Atl.  | - | 8.55  | - | - | - | - | 2.74 | 3.59 | - | - | 9.82  | - | - | - | - | - | - | - |
| LOPHELIA PERTUSA     | natural | N. Atl.  | - | 9.6   | - | - | - | - | 2.47 | 3.39 | - | - | 8.38  | - | - | - | - | - | - | - |
| LOPHELIA PERTUSA     | natural | N. Atl.  | - | 9.05  | - | - | - | - | 2.4  | 3.57 | - | - | 8.56  | - | - | - | - | - | - | - |
| LOPHELIA PERTUSA     | natural | N. Atl.  | - | 9.38  | - | - | - | - | 3.09 | 3.32 | - | - | 10.29 | - | - | - | - | - | - | - |
| MADREPORA OCULATA    | natural | N. Atl.  | - | 11.2  | - | - | - | - | 3.06 | 3.05 | - | - | 9.34  | - | - | - | - | - | - | - |
| LOPHELIA PERTUSA     | natural | GoM      | - | 9.3   | - | - | - | - | 2.54 | 3.3  | - | - | 8.39  | - | - | - | - | - | - | - |
| LOPHELIA PERTUSA     | natural | Med.     | - | 13.65 | - | - | - | - | 2.79 | 2.81 | - | - | 7.84  | - | - | - | - | - | - | - |
| LOPHELIA PERTUSA     | natural | Med.     | - | 13.75 | - | - | - | - | 3.05 | 2.87 | - | - | 8.75  | - | - | - | - | - | - | - |
| LOPHELIA PERTUSA     | natural | Med.     | - | 13.75 | - | - | - | - | 2.97 | 2.87 | - | - | 8.53  | - | - | - | - | - | - | - |
| LOPHELIA PERTUSA     | natural | Med.     | - | 13.58 | - | - | - | - | 3.15 | 2.81 | - | - | 8.85  | - | - | - | - | - | - | - |
| FLABELLUM IMPENSUM   | natural | S. Pac.  | - | 0.75  | - | - | - | - | 3.26 | 5.22 | - | - | 17.03 | - | - | - | - | - | - | - |
| PORITES SP.          | natural | Eq. Pac. | - | 27.1  | - | - | - | - | 4.31 | 1.38 | - | - | 5.96  | - | - | - | - | - | - | - |
| PORITES SP.          | natural | Eq. Pac. | - | 24.4  | - | - | - | - | 3.91 | 1.62 | - | - | 6.33  | - | - | - | - | - | - | - |
| PORITES SP. (JCP-1)  | natural | N. Pac.  | - | 26.1  | - | - | - | - | 4.21 | 1.43 | - | - | 6.01  | - | - | - | - | - | - | - |
| CLADOCORA CAESPITOSA | culture | -        | - | 15    | - | - | - | - | 4.22 | 2.53 | - | - | 10.69 | - | - | - | - | - | - | - |
| CLADOCORA CAESPITOSA | culture | -        | - | 18    | - | - | - | - | 4.25 | 2.26 | - | - | 9.61  | - | - | - | - | - | - | - |
| CLADOCORA CAESPITOSA | culture | -        | - | 21    | - | - | - | - | 3.7  | 2.09 | - | - | 7.74  | - | - | - | - | - | - | - |
| CLADOCORA CAESPITOSA | culture | -        | - | 23    | - | - | - | - | 3.88 | 1.85 | - | - | 7.16  | - | - | - | - | - | - | - |
| ACROPORA SP.         | culture | -        | - | 22    | - | - | - | - | 4.52 | 1.96 | - | - | 8.85  | - | - | - | - | - | - | - |
| ACROPORA SP.         | culture | -        | - | 25    | - | - | - | - | 4.52 | 1.7  | - | - | 7.69  | - | - | - | - | - | - | - |
| ACROPORA SP.         | culture | -        | - | 28    | - | - | - | - | 4.92 | 1.42 | - | - | 6.97  | - | - | - | - | - | - | - |

24

25 Suffix "carb" for aragonite, "cf" for calcifying fluid, "sw" for seawater, "Eq." for equatorial, "Pac." for Pacific, "Atl" for Atlantic, "Med" for the Mediterranean Sea, "GoM" for Gulf of Mexico, "M" for molar ratio (mol/mol).

26 (a) this study, (b) (Marriott et al., 2004), (c) (Rollion-Bard et al., 2009), (d) (Bastian et al., 2018), (e) (Huang et al., 2009), (f) (Bohlin et al., 2018), (g) (Comeau et al., 2017), (h) (Venn et al., 2013), (i) (McCulloch et al.,

27 2017), (j) (Montagna et al., 2014).



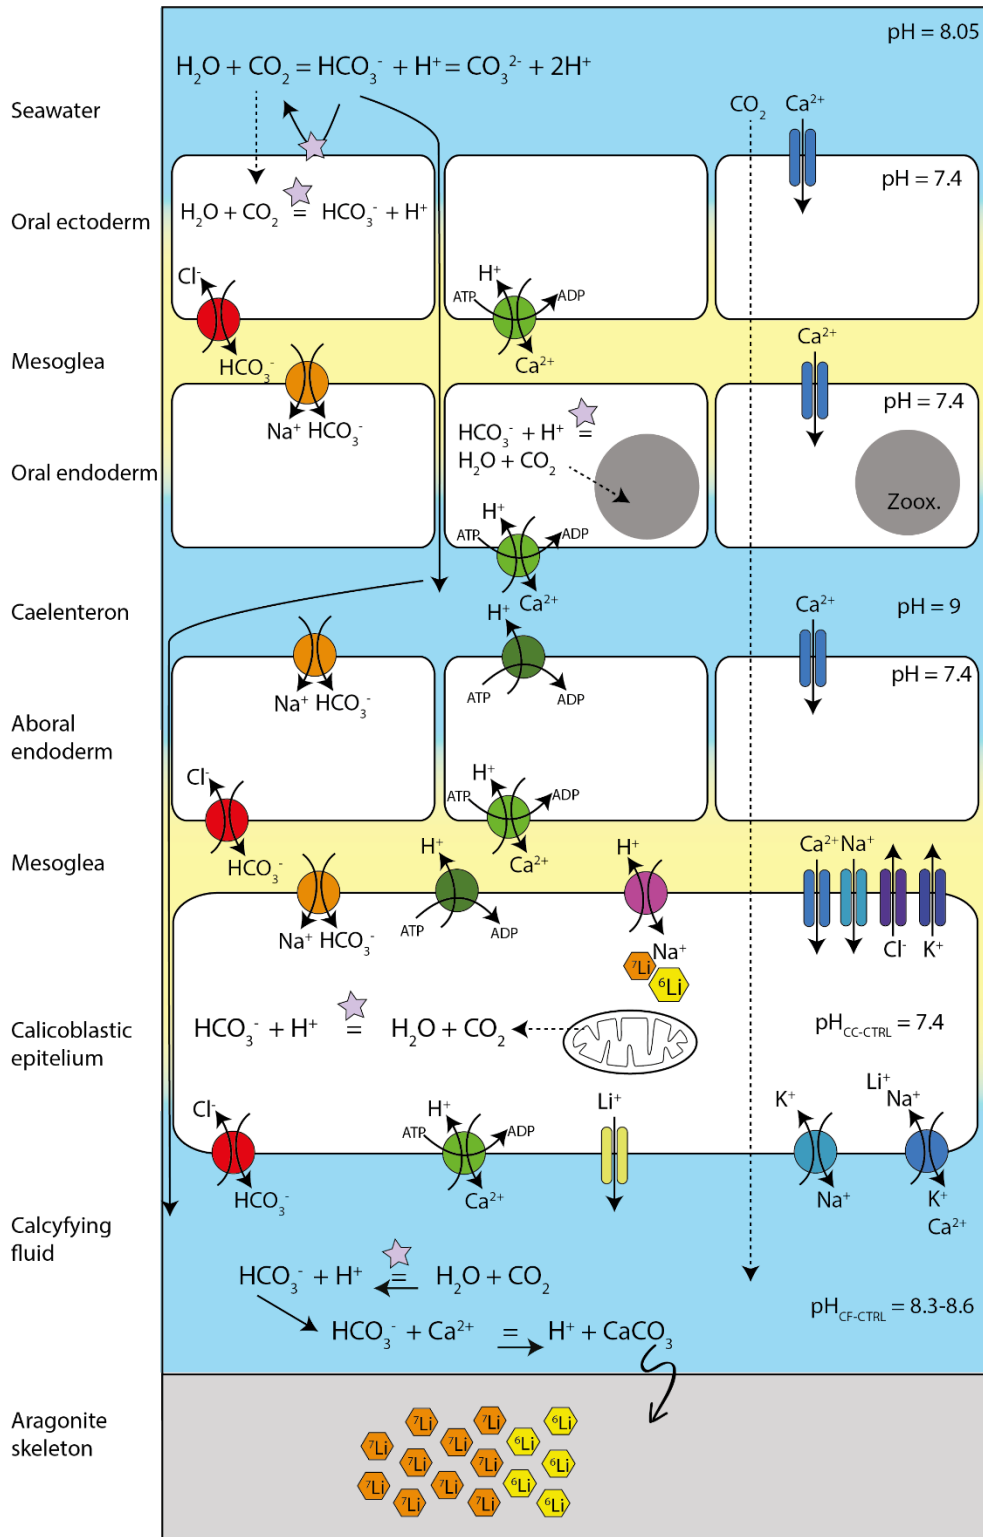

**Figure S1:** Schematic of corals tissues cross-section from seawater (top) to aragonite skeleton (bottom), and associated ion transport processes controlling calcifying fluid composition. Individual cells are represented by white rectangles. Ion transporters (symporters, antiporters, or pumps) are in colored circles, while passive ion channels are in colored rectangles. The stars represent the action of carbonic anhydrase. Heavy Li isotopes are in orange hexagons, and light Li isotopes, in yellow hexagons.

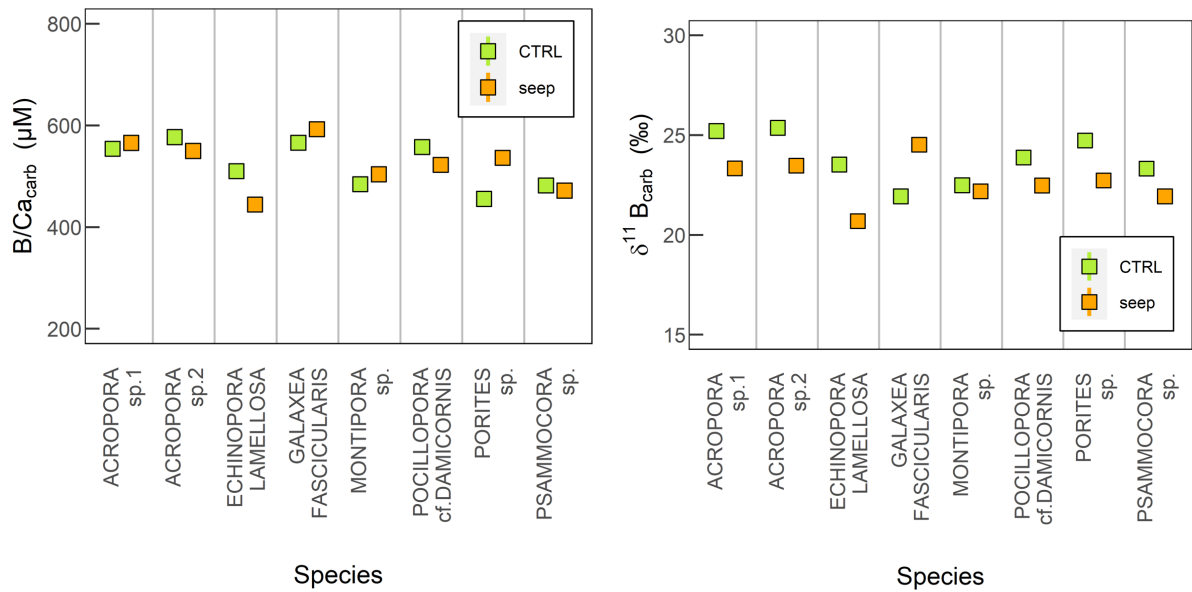

**Figure S2:** Coral B/Ca ( $\mu\text{M}$ ) (A) and B isotope composition  $\delta^{11}\text{B}_{\text{carb}}$  (‰) (B) for each coral species collected at the control (green) and seep sites (orange).

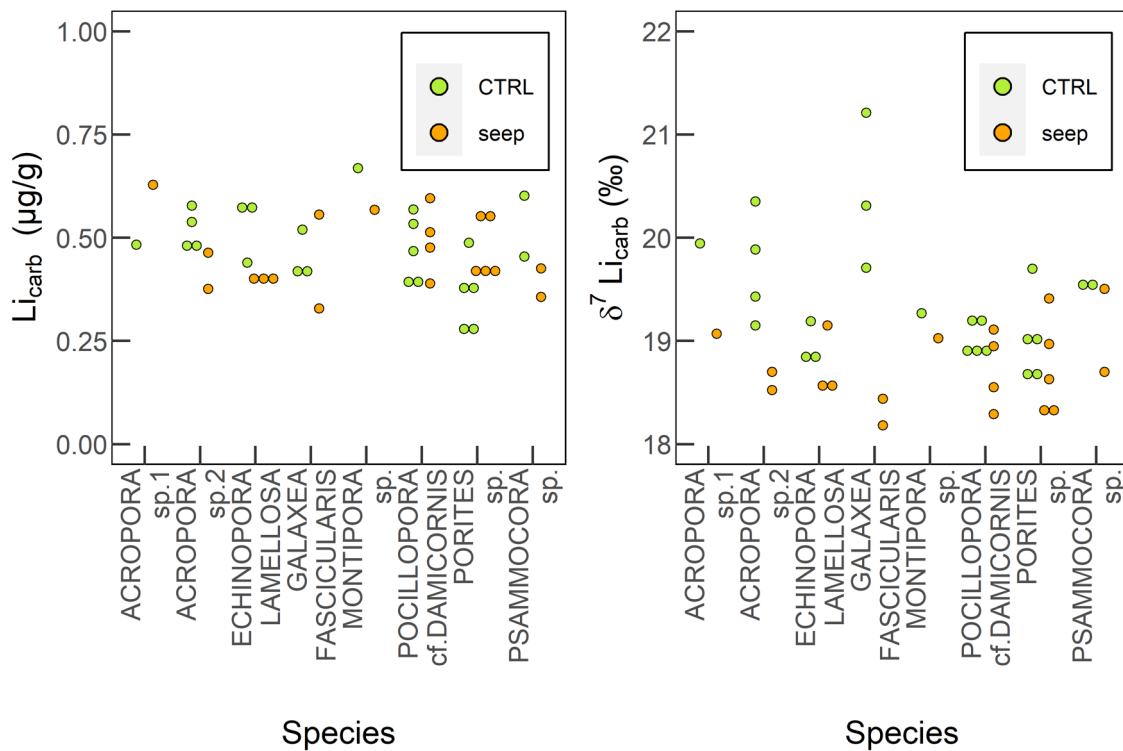

**Figure S3:** Coral Li concentration ( $\mu\text{g g}^{-1}$ ) (A) and Li isotope composition  $\delta^7\text{Li}_{\text{carb}}$  (‰) (B) per species and site of collection. Orange circles are for corals living under high  $p\text{CO}_2$  seawater (seep), while green circles are for corals living at the control site.

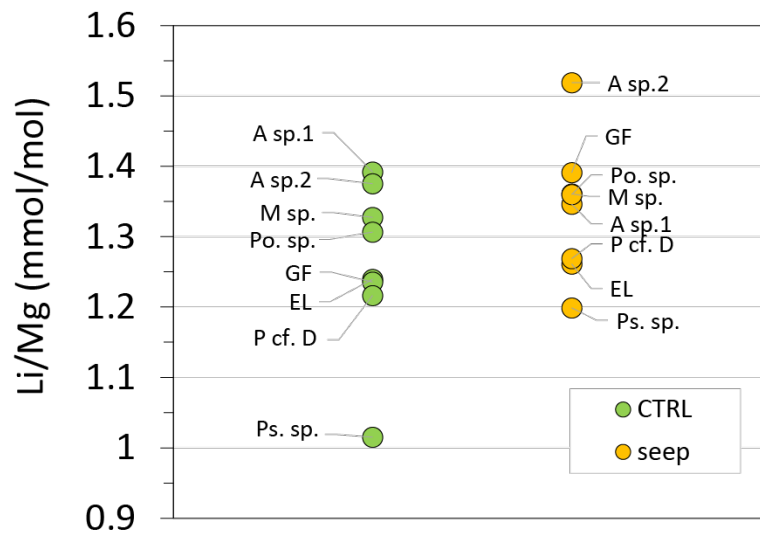

**Figure S4:** (B)  $\text{Li}/\text{Mg}_{\text{carb}}$  ratios under CTRL and seep conditions (this study). A for *Acropora*, M for *Montipora*, Po. for *Porites*, P cf. D *Pocillopora* c.f. *damicornis*, EL for *Echinopora lamellosa*, Ps. for *Psammocora*, GF for *Galaxea fascicularis*.

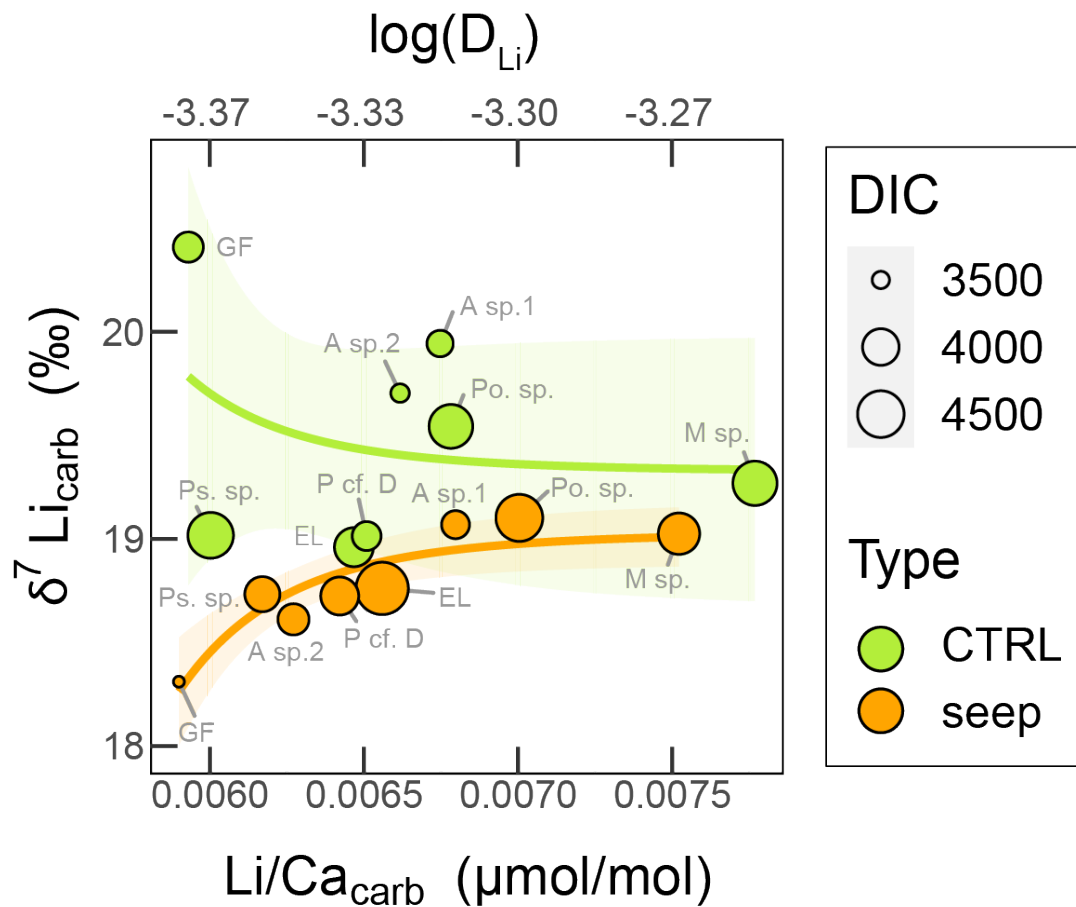

**Figure S5:** Coral Li isotope composition  $\delta^7\text{Li}_{\text{carb}}$  (‰) versus coral  $\text{Li}/\text{Ca}_{\text{carb}}$  concentration ratio (bottom x-axis) and partition coefficient  $D_{\text{Li}}$  (top x-axis). Orange circles are for corals living at the seep site, while green circles are for corals living at the CTRL site. Circle sizes are proportional to  $\text{DIC}_{\text{cf}}$  ( $\mu\text{mol kg}^{-1}$ ). Solid lines are the exponential fits, and the shadow zones, the confidence intervals. Grey text refers to the initials of the corals species (see Table S1).
